# Supplementary material for: Electronic Alerts with Automated Consultations Promote Appropriate Antimicrobial Prescriptions
Source: PubMed Central journal article supplement (PMC4988717; doi:10.1371/journal.pone.0160551), 2016-08-17
Supplement: pone.0160551.s004.pdf [file pone.0160551.s004.pdf]

**S1 Table. Log-rank *p*-values according to the subgroups**

|                          | Time to effective | Time to optimal | Time to de-escalation | Time to intravenous to oral switch |
|--------------------------|-------------------|-----------------|-----------------------|------------------------------------|
| 22% vs. 78% <sup>*</sup> | 0.075             | 0.345           | 0.872                 | 0.810                              |
| Pre-program vs. 22%      | 0.002             | <0.001          | 0.088                 | 0.233                              |
| Pre-program vs. 78%      | <0.001            | <0.001          | 0.014                 | 0.126                              |

<sup>\*</sup>22%: canceled subgroup, 78%: not canceled subgroup
